# Supplementary material for: Evoked auditory potentials from African mole-rats and coruros reveal disparity in subterranean rodent hearing
Source: Oxford University Press journal article supplement (doi:10.1242/jeb.243371), 2021-10-27
Supplement: jeb243371supp.pdf [file jeb243371supp.pdf]

**Table S1.** Individual-level auditory thresholds (in dB SPL) for three subterranean rodent species. Threshold values are rounded to 1 dB.

Frequencies are provided in kHz. See Table 1 for further information on each subject.

**Naked mole-rat (*Heterocephalus glaber*)**

| Frequency | HG1 3105 | HG1 67311 | HG2 5400 | HG2 7311 | HG3 5401 | HG3 5402 | HG3 5403 | HG3 5408 | HG3 5422 | HG3 5423 | HG3 5424 | HG5 5351 |
|-----------|----------|-----------|----------|----------|----------|----------|----------|----------|----------|----------|----------|----------|
| 0.03      | 60       | 80        | 77       | 73       | 77       | 80       | 80       | 57       | 70       | 70       | 57       | 80       |
| 0.05      | 63       | 80        | 75       | 62       | 65       | 70       | 75       | 68       | 63       | 58       | 70       | 80       |
| 0.1       | 32       | 72        | 80       | 80       | 58       | 72       | 58       | 48       | 75       | 57       | 60       | 80       |
| 0.2       | 48       | 55        | 63       | 57       | 48       | 57       | 60       | 78       | 45       | 62       | 53       | 58       |
| 0.5       | 47       | 52        | 38       | 55       | 50       | 50       | 63       | 80       | 28       | 32       | 53       | 47       |
| 1         | 40       | 45        | 40       | 43       | 30       | 48       | 40       | 57       | 35       | 27       | 43       | 27       |
| 2         | 27       | 40        | 50       | 25       | 53       | 43       | 35       | 45       | 32       | 42       | 43       | 35       |
| 3         | 23       | 12        | 40       | 45       | 47       | 52       | 37       | 68       | 35       | 40       | 40       | 27       |
| 3.5       | 33       | 38        | 52       | 25       | 60       | 40       | 57       | 50       | 37       | 38       | 40       | 47       |
| 4         | 28       | 47        | 52       | 43       | 63       | 40       | 47       | 73       | 50       | 25       | 48       | 72       |
| 4.5       | 27       | 55        | 58       | 30       | 55       | 47       | 17       | 80       | 55       | 47       | 30       | 72       |
| 5         | 22       | 43        | 62       | 25       | 48       | 37       | 53       | 80       | 47       | 43       | 43       | 80       |
| 6         | 45       | 43        | 60       | 55       | 60       | 38       | 80       | 80       | 75       | 52       | 53       | 52       |
| 8         | 40       | 55        | 73       | 73       | 62       | 40       | 67       | 80       | 47       | 57       | 58       | 80       |
| 12        | 55       | 80        | 78       | 77       | 75       | 80       | 65       | 60       | 48       | 62       | 72       | 80       |
| 16        | /        | 75        | /        | 80       | 62       | /        | /        | 63       | 63       | 78       | 60       | /        |
| 18        | /        | /         | /        | /        | 62       | /        | /        | /        | 65       | /        | /        | /        |

**Mashona mole-rat (*Fukomys darlingi*)**

| Frequency | FD1 5450 | FD1 9399 | FD2 2229 | FD2 5361 | FD2 5441 | FD3 30000 | FD4 0815 | FD5 4105 | FD5 4686 |
|-----------|----------|----------|----------|----------|----------|-----------|----------|----------|----------|
| 0.03      | 58       | 75       | 77       | 75       | 67       | 75        | 80       | 80       | 80       |
| 0.05      | 65       | 80       | 78       | 78       | 78       | 77        | 78       | 75       | 80       |
| 0.1       | 60       | 80       | 70       | 80       | 65       | 80        | 78       | 75       | 70       |
| 0.2       | 45       | 60       | 57       | 37       | 48       | 80        | 63       | 57       | 73       |
| 0.4       | 48       | 73       | 52       | 45       | 38       | 78        | 52       | 55       | 75       |
| 0.7       | 32       | 48       | 50       | 45       | 33       | 73        | 57       | 50       | 60       |
| 1         | 33       | 53       | 37       | 22       | 32       | 60        | 58       | 27       | 58       |
| 1.3       | 38       | 70       | 47       | 8        | 37       | 73        | 55       | 45       | 68       |
| 1.7       | 38       | 65       | 45       | 35       | 40       | 62        | 72       | 53       | 80       |
| 2         | 33       | 75       | 65       | 23       | 50       | 72        | 45       | 57       | 60       |
| 4         | 43       | 60       | 77       | 40       | 60       | 80        | 78       | 77       | 77       |
| 6         | 43       | 77       | 80       | 60       | 77       | 77        | 70       | 72       | 75       |
| 8         | 80       | 80       | 70       | 80       | 77       | 77        | 80       | 72       | 62       |
| 12        | 67       | 75       | 77       | 80       | 73       | 73        | 80       | 67       | 68       |
| 16        | 70       | 72       | 70       | 80       | 68       | 68        | 73       | 73       | 78       |

**Coruro (*Spalacopus cyanus*)**

| Frequency | SC1 2797 | SC1 7664 | SC2 2732 | SC2 2760 | SC2 2780 | SC2 9892 | SC3 5343 | SC3 5346 | Scae 5377 | SCae 8732 | SCh 0820 | SCh 5345 |
|-----------|----------|----------|----------|----------|----------|----------|----------|----------|-----------|-----------|----------|----------|
| 0.03      | 80       | 80       | 75       | 80       | 70       | 80       | 70       | 75       | 68        | 80        | 80       | 80       |
| 0.05      | 80       | 80       | 80       | 57       | 72       | 72       | 50       | 75       | 55        | 77        | 80       | 45       |
| 0.1       | 57       | 67       | 45       | 77       | 48       | 75       | 73       | 80       | 47        | 65        | 77       | 80       |
| 0.2       | 42       | 50       | 50       | 43       | 50       | 45       | 50       | 35       | 47        | 55        | 45       | 58       |
| 0.5       | 47       | 30       | 28       | 37       | 33       | 22       | 55       | 33       | 33        | 43        | 35       | 33       |
| 1         | 35       | 15       | 18       | 37       | 18       | 23       | 27       | 20       | 22        | 13        | 22       | 37       |
| 1.3       | 8        | 37       | 7        | 13       | 20       | 2        | 15       | 23       | 22        | 20        | 10       | 25       |
| 1.7       | 25       | 10       | 7        | 23       | 25       | 25       | 8        | 12       | 12        | 22        | 22       | 27       |
| 2         | 15       | 32       | 12       | 17       | 17       | 13       | 30       | 7        | 15        | 8         | 23       | 28       |
| 3         | 33       | 28       | 20       | 8        | 20       | 25       | 13       | 8        | 22        | 15        | 25       | 32       |
| 6         | 32       | 28       | 15       | 30       | 33       | 30       | 55       | 33       | 23        | 15        | 22       | 15       |
| 12        | 15       | 45       | 8        | 30       | 33       | 20       | 40       | 25       | 18        | 22        | 35       | 40       |
| 16        | 23       | 45       | 28       | 38       | 30       | 23       | 65       | 27       | 30        | 43        | 23       | 27       |
| 24        | 12       | 55       | 22       | 17       | 32       | 17       | 60       | 22       | 52        | 73        | 42       | 75       |
| 32        | 33       | 78       | 33       | 47       | 52       | 30       | 60       | 18       | 38        | 60        | 17       | 52       |
| 36        | 75       | /        | /        | /        | /        | /        | /        | /        | 45        | /         | 75       | /        |

**Table S2.** Results of statistical comparisons (ANOVA, Kruskal-Wallis test, paired Wilcoxon test, Tukey's honest significant differences (THSD)) of hearing thresholds in coruros, Mashona mole-rats (MMR) and naked mole-rats (NMR). Frequencies are provided in kHz. Significant *p*-values are indicated in bold.

| Frequency | Coruro / MMR                                           | Coruro / NMR                              | MMR / NMR                              |
|-----------|--------------------------------------------------------|-------------------------------------------|----------------------------------------|
| 0.03      | Kruskal-Wallis chi-squared = 1.8857, <i>p</i> = 0.3895 |                                           |                                        |
| 0.05      | Kruskal-Wallis chi-squared = 4.5134, <i>p</i> = 0.1047 |                                           |                                        |
| 0.1       | ANOVA: F-value = 1.503 <i>p</i> = 0.238                |                                           |                                        |
| 0.2       | THSD, <b><i>p</i> = 0.041</b>                          | THSD, <b><i>p</i> = 0.047</b>             | THSD, <i>p</i> = 0.983                 |
| 1         | THSD, <b><i>p</i> &lt; 0.001</b>                       | THSD, <b><i>p</i> = 0.002</b>             | THSD, <i>p</i> = 0.828                 |
| 2         | THSD, <b><i>p</i> &lt; 0.001</b>                       | THSD, <b><i>p</i> &lt; 0.001</b>          | THSD, <b><i>p</i> = 0.017</b>          |
| 4         | NA                                                     | NA                                        | Wilcoxon Test, <b><i>p</i> = 0.039</b> |
| 6         | Wilcoxon Test, <b><i>p</i> &lt; 0.001</b>              | Wilcoxon Test, <b><i>p</i> &lt; 0.001</b> | Wilcoxon Test, <i>p</i> = 0.238        |
| 12        | Wilcoxon Test, <b><i>p</i> &lt; 0.001</b>              | Wilcoxon Test, <b><i>p</i> &lt; 0.001</b> | Wilcoxon Test, <i>p</i> = 1            |
| 16        | THSD, <b><i>p</i> &lt; 0.001</b>                       | THSD, <b><i>p</i> &lt; 0.001</b>          | THSD, <i>p</i> = 0.701                 |
